# Supplementary material for: Tuning the catalytic selectivity in biomass-derived succinic acid hydrogenation on FeOx-modified Pd catalysts
Source: Royal Society of Chemistry journal article supplement (doi:10.1039/c5ta03843j), 2015-01-01
Supplement: c5ta03843j1.pdf [file c5ta03843j1.pdf]

## Tuning the catalytic selectivity in biomass-derived succinic acid

### hydrogenation on FeO<sub>x</sub>-modified Pd catalysts

Xiaoran Liu,<sup>‡ac</sup> Xicheng Wang,<sup>‡a</sup> Guoqiang Xu,<sup>a</sup> Qiang Liu,<sup>ac</sup> Xindong Mu<sup>a</sup> and Haichao Liu<sup>b</sup>

a. Key Laboratory of Biobased Materials, Qingdao Institute of Bioenergy and Bioprocess  
Technology, Chinese Academy of Sciences, Qingdao 266101, P. R. China. E-mail:

muxd@qibebt.ac.cn

b. Beijing National Laboratory for Molecular Sciences, College of Chemistry and Molecular  
Engineering, Peking University, Beijing 100871, P. R. China. E-mail: hcliu@pku.edu.cn

c. University of Chinese Academy of Sciences, Beijing, 100049, P. R. China.

<sup>‡</sup>These authors contributed equally to this work.

### Contents

|               |   |
|---------------|---|
| Fig. S1.....  | 2 |
| Fig. S2.....  | 3 |
| Fig. S3.....  | 4 |
| Fig. S4.....  | 5 |
| Fig. S5.....  | 6 |
| Fig. S6.....  | 7 |
| Fig. S7.....  | 8 |
| Table S1..... | 9 |

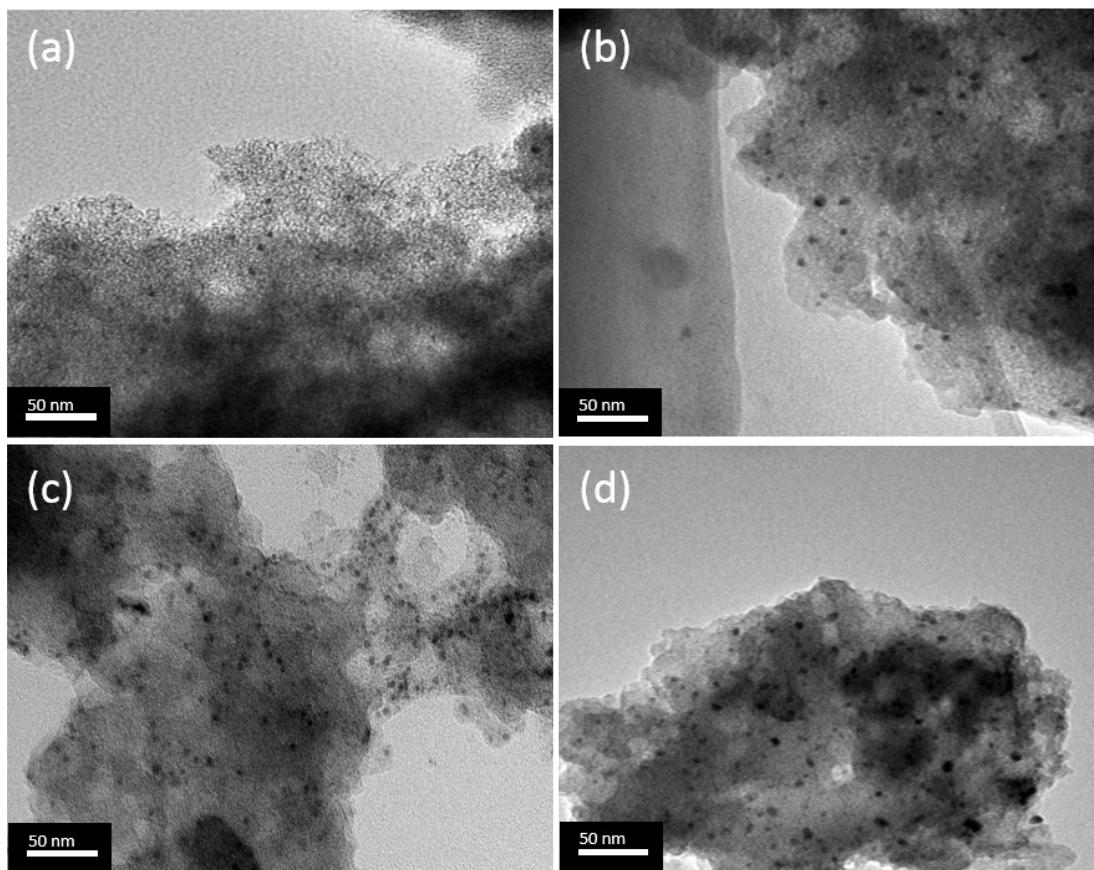

**Fig. S1** TEM images of Pd-FeO<sub>x</sub>/C catalysts: (a) Pd/C, (b) Pd-1FeO<sub>x</sub>/C, (c) Pd-5FeO<sub>x</sub>/C and (d) Pd-10FeO<sub>x</sub>/C.

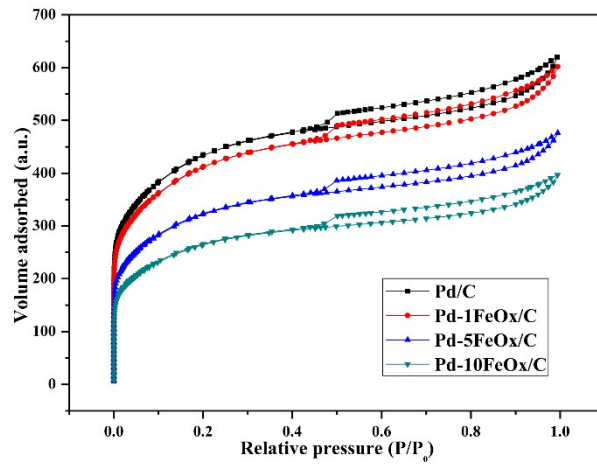

**Fig. S2** Nitrogen sorption isotherms at 77.3 K.

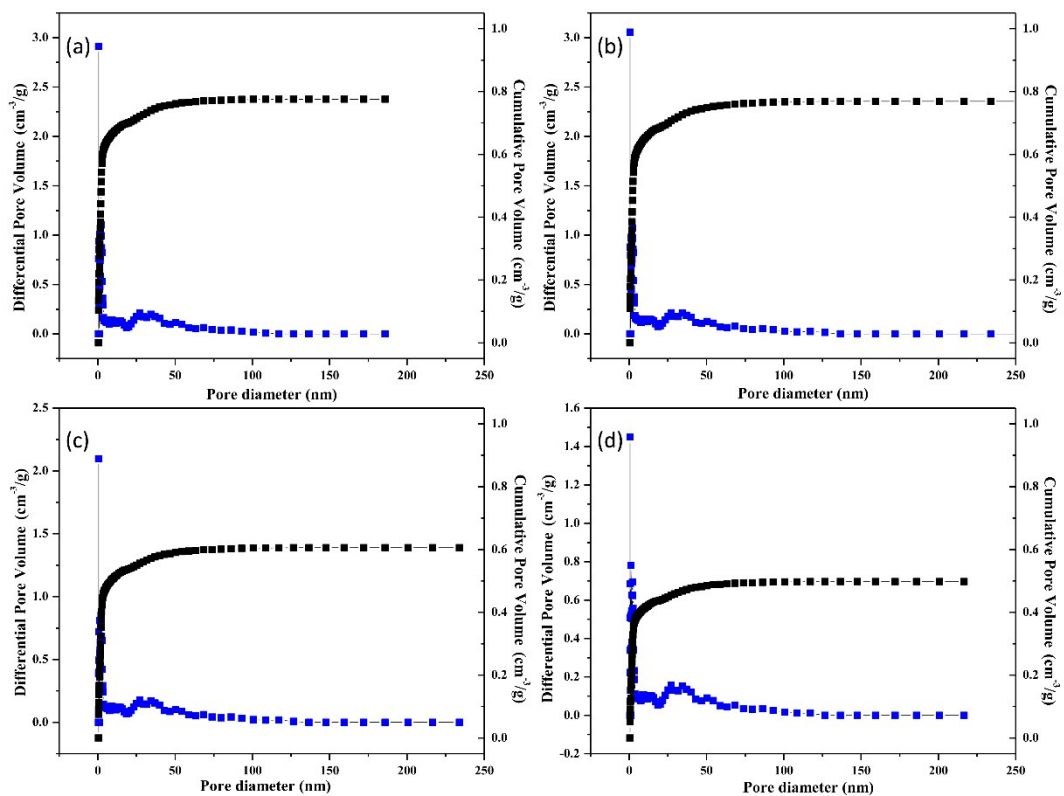

**Fig. S3** Pore size distributions of Pd-FeO<sub>x</sub>/C catalysts: (a) Pd/C, (b) Pd-1FeO<sub>x</sub>/C, (c) Pd-5FeO<sub>x</sub>/C and (d) Pd-10FeO<sub>x</sub>/C.

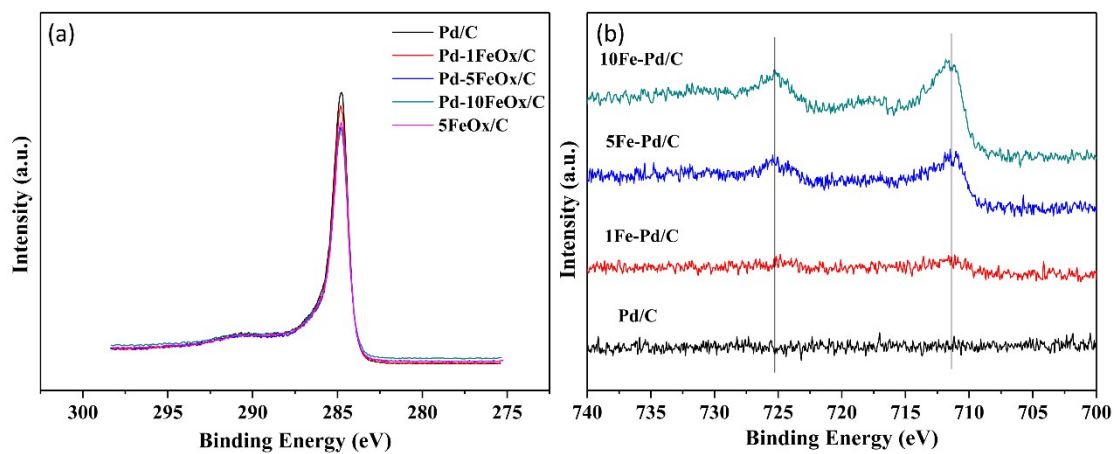

**Fig. S4** XPS spectra of Pd-FeO<sub>x</sub>/C catalysts: (a) C 1s spectra, (b) Fe 2p spectra.

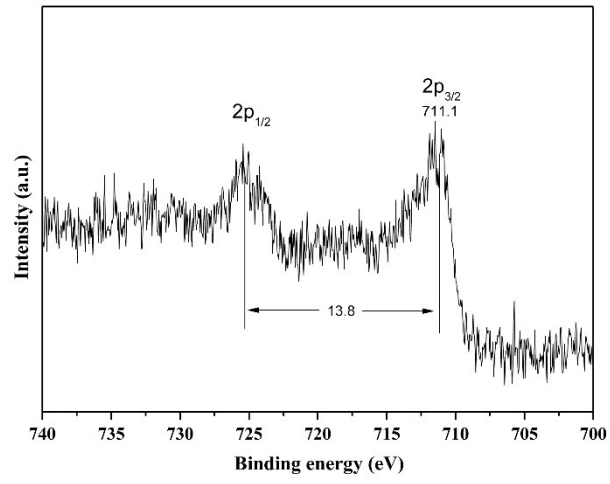

Fig. S5 Fe 2p spectrum of Pd-5FeO<sub>x</sub>/C catalysts

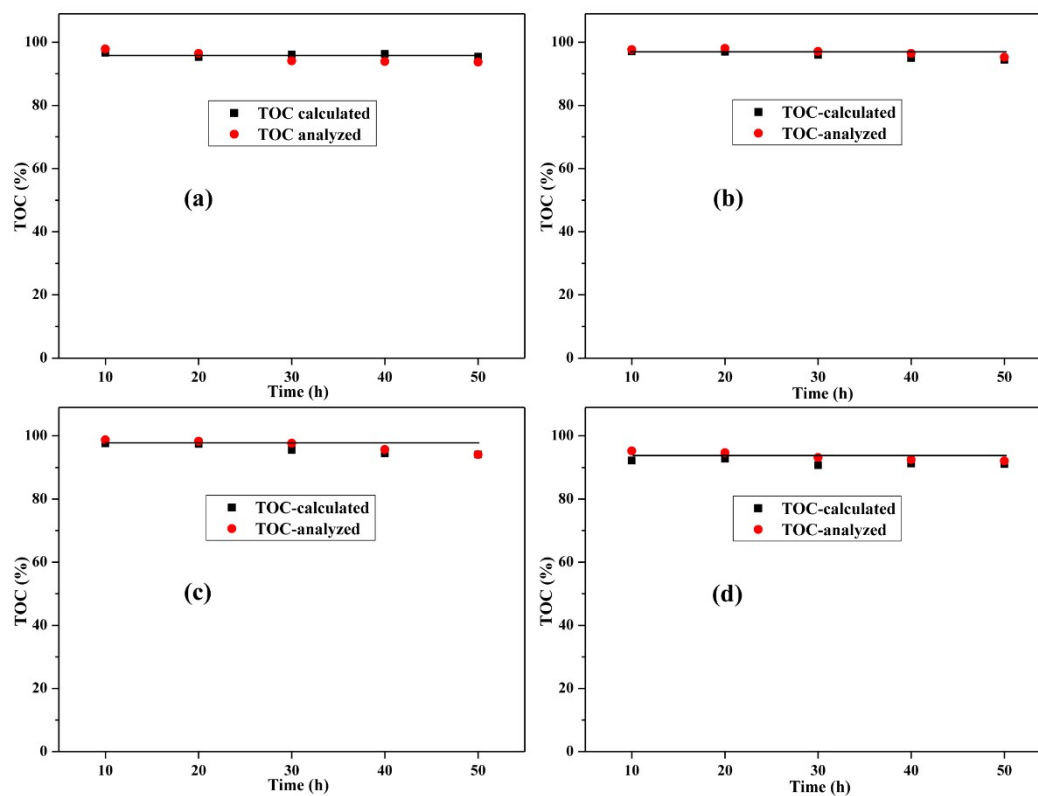

**Fig. S6** Evolution of TOC in aqueous solution as a function of time. (a) Pd/C, (b) Pd-1FeO<sub>x</sub>/C, (c) Pd-5FeO<sub>x</sub>/C and (d) Pd-10FeO<sub>x</sub>/C.

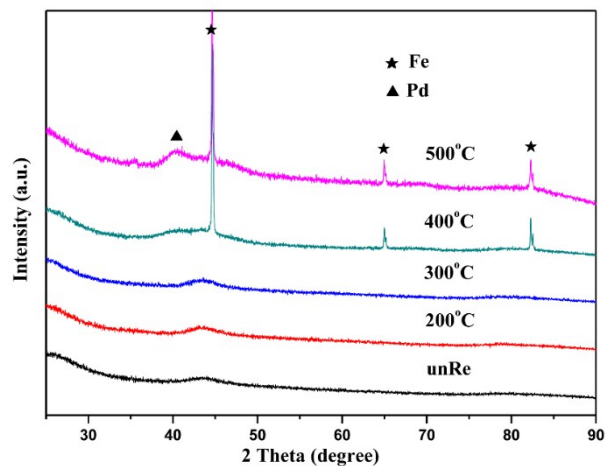

**Fig. S7** XRD patterns of Pd-FeO<sub>x</sub>/C reduced at different temperatures.

Fig. S7 shows the XRD patterns of Pd-5FeO<sub>x</sub>/C reduced at different temperatures. No peaks belonged to Fe and Pd species could be observed at the reduction temperature of 200°C and 300°C. However, obvious sharp peaks belonged to Fe could be observed at 400°C, indicating that FeO<sub>x</sub> was reduced to Fe at 400°C. Meanwhile, peak located at about 40° which belonged to Pd emerged at a higher temperature (above 400°C) which indicated the particle size of Pd increased as we elevated the reduction temperature.



**Table S1** SA hydrogenation over Pd-5FeO<sub>x</sub>/C reduced at different temperatures<sup>a</sup>

| Entry | Reduction temperature (°C) | Conv. (%) | Selectivity (%) |      |      |     |     |
|-------|----------------------------|-----------|-----------------|------|------|-----|-----|
|       |                            |           | THF             | GBL  | BDO  | PA  | BA  |
| 1     | 200                        | 87.7      | 3.2             | 65.3 | 21.6 | 1.8 | 5.3 |
| 2     | 300                        | 83.3      | 5.9             | 74.8 | 10.3 | 1.5 | 4.0 |
| 3     | 400                        | 60.2      | 6.6             | 84.5 | 0    | 2.2 | 3.6 |
| 4     | 500                        | 56.7      | 8.0             | 76.5 | 0    | 5.6 | 3.3 |

<sup>a</sup> Reaction conditions: T = 200°C; P = 5 MPa H<sub>2</sub> (RT); reaction time = 10 h.

Conv.: conversion, SA: succinic acid, THF: tetrahydrofuran, GBL:  $\gamma$ -butyrolactone, BDO: 1,4-butanediol, PA: propionic acid and BA: butyric acid.

We also investigated the catalytic activity of Pd-5FeO<sub>x</sub>/C reduced at different temperatures in the SA hydrogenation. The results were shown in Table S1. SA conversion decreased over the catalysts reduced at a higher temperature (above 200°C). The decline of catalytic activity might attribute to the increase of metal particles size and the changes in the Fe chemical state. The results demonstrated the significant role of the interaction between FeO<sub>x</sub> species and Pd in the SA hydrogenation. Selectivity to BDO decreased while the selectivity to THF increased slightly with the elevating of reduction temperature. Therefore, 200°C was used instead of a higher temperature in this research.
